# Supplementary material for: Chitinase Is Involved in the Fruiting Body Development of Medicinal Fungus Cordyceps militaris
Source: MDPI journal article supplement (doi:10.3390/life13030764), 2023-03-12
Supplement: s1 [file s1]

**Table S1.** Real-time PCR and *Chi1*, *Chi4* and *HygR* gene silent fragment primer sequences

| Primer Name       | Sequence (5'-3')                                |
|-------------------|-------------------------------------------------|
| <i>Chi1</i> -F/R  | CCACCTTTTCCGACATTGCT<br>CTTTTGCCTGGGGGTATTCC    |
| <i>Chi2</i> -F/R  | ATCGTGGTGGCGAAGAGCA<br>TGGTGTGGCTCTGGACGAT      |
| <i>Chi3</i> -F/R  | TATTGAAGGACTTGCCGCC<br>GCTGCTTGTTGAACTGTGT      |
| <i>Chi4</i> -F/R  | TGCAAAGACCTTGCGTGCT<br>AAGCGACACTGTTTCGTTGGT    |
| <i>Chi5</i> -F/R  | CAACCTGCCCTTTTTCATCA<br>GTCATTGGCCTTCCGCT       |
| <i>Chi6</i> -F/R  | GTCCGTCTCCGACACAATC<br>GCTCTCATCTCGCCCGTTA      |
| <i>Chi7</i> -F/R  | AAAAGTCGCCAATGCTACAGC<br>TGCAGTGTTGCTGGTCATTGT  |
| <i>Chi8</i> -F/R  | CGATTTGCGTTCCGATTC<br>TTGGGAGCGGATTGAGAGTG      |
| <i>Chi9</i> -F/R  | TCCAGACCTCCACTAACCGA<br>CGGCAGGCATATCAATGTG     |
| <i>Chi10</i> -F/R | ACATCAGGCAAACCTCTACCC<br>ACAACGGCATAACCAAGGACTA |
| <i>Chi11</i> -F/R | CGCCAGTCCTATCATTTG<br>CATTGTCGTTTGCCATTCC       |
| <i>Chi12</i> -F/R | TCACCAATCACCACACCTCT<br>TATTCGTGTCCTTGCCTTCG    |
| <i>Chi13</i> -F/R | TACGGATACTGGGACGAGC<br>CTAAGCAAGGCACGAACAC      |
| <i>Chi14</i> -F/R | ATCCGCAACATTGTCCGCTA<br>AAACGCCACCTCCATCTGCT    |
| <i>TUB</i> -F/R   | ATGTCGTTTCGTCGTGAGG<br>AGAGTGGCGTTGTAGGGT       |

| Primer Name      | Sequence (5'-3')              |
|------------------|-------------------------------|
| <i>Chi1</i> -F/R | CGCggatccTCGAGGTCGAGCCTCTGA   |
|                  | ACGCgtcgacGATGCGTACTGCGTATTGG |
| <i>Chi4</i> -F/R | CGCggatccCCCGTCTTCCACATCAATAG |
|                  | ACGCgtcgacTAGGGTGGAGGTTTGCGTA |
| HygR             | TTCAGGCTTTTTCAT               |
|                  | TTTCTTTGCCCTCGG               |
